# Supplementary material for: Failure modes of loose landslide deposits in 2008Wenchuan earthquake area in China
Source: Copernicus journal article supplement (doi:10.5194/nhess-2019-25), 2019-05-20
Supplement: Supplementary file [file nhess-2019-25-AC5-supplement.pdf]

**Reviewer B (Chong Xu, 16 Jun 2019 )**

**Comments from Referees:** The core data (Fig. 1) of slope deposits triggered by the Wenchuan earthquake is totally wrong. There are quite a few papers on landslides (include various types) triggered by the earthquake and the spatial patterns of the landslides is very consistent and recognised. However, the authors neglected most of the important research and represented a self-conceived 2008 Wenchuan earthquake-triggered landslide distribution map but have no correlation with the quake.

**Response:** The core data (Fig.1 ) of slope deposits triggered by the Wenchuan earthquake has been changed to “Statistical distribution of Loose deposits postearthquake in Sichuan Province, China” in Page 4 Fig.1.

In this paper is based on the statistical analysis of geological hazard data in Sichuan after the 2008 Wenchuan earthquake by China Geological Survey. As Dr. Xu said, the data of these geological hazard accumulations are not entirely caused by the earthquake but there in the earthquake area. This manuscript mainly studies the deformation and failure modes of loose accumulation bodies in Sichuan province after the earthquake. Therefore, all the loose accumulation bodies in this region are taken as research objects.
